# Supplementary material
Source: PubMed Central journal article supplement (PMC5580935)
Supplement: NIHMS898795-supplement-supplement_1.pdf [file NIHMS898795-supplement-supplement_1.pdf]

## Supplemental Information

A) Salt

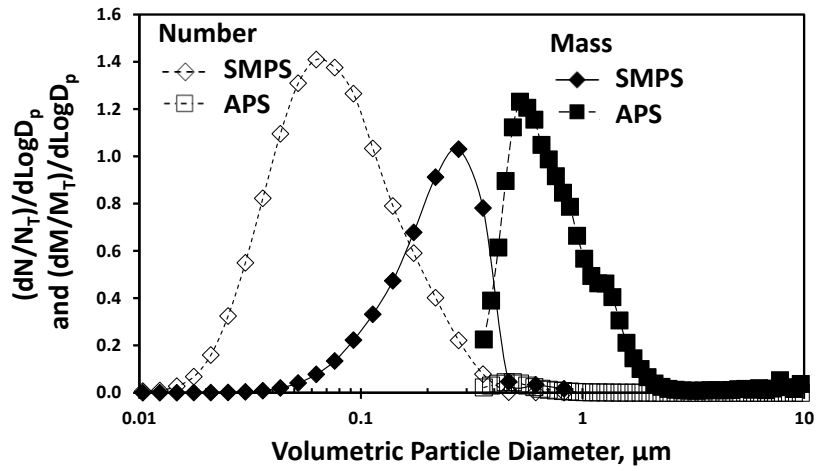

B) Welding fume

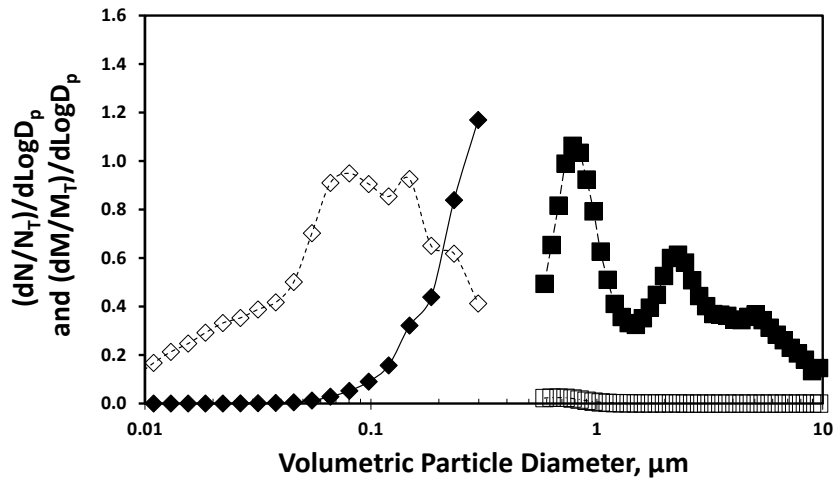

C) ARD

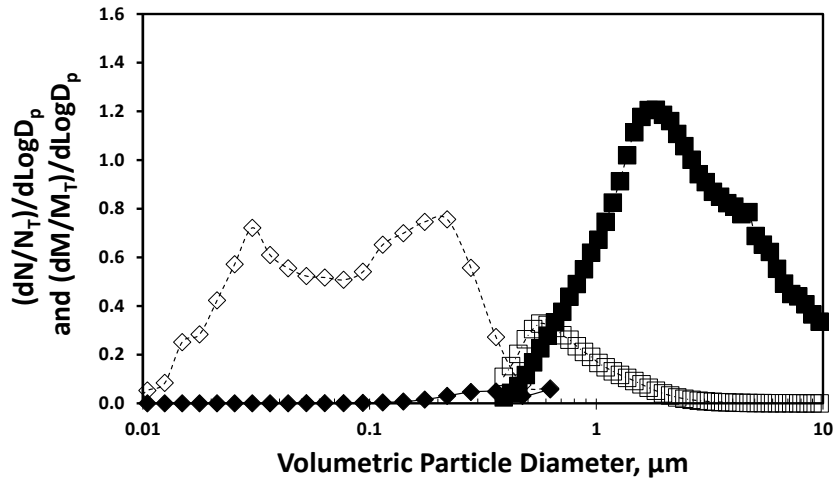

Figure 5: Fractional number  $(dN/N_T)$  and mass concentration  $(dM/M_T)$  by size measured for A) Salt; B) Welding fume; and C) ARD

Table S1: Assumed density and shape factor used in diameter conversions.

| Aerosol                        | Density (kg/m <sup>3</sup> ) | Shape Factor           |
|--------------------------------|------------------------------|------------------------|
| Salt aerosol <sup>1</sup>      | 2200                         | 1.08                   |
| Welding Fume <sup>2</sup>      | 3400                         | (1.9-3.9) <sup>3</sup> |
| Arizona Road Dust <sup>4</sup> | 2650                         | 1.5                    |

<sup>1</sup>(Thomas M. Peters, Chein, Lundgren, & Keady, 1993)

<sup>2</sup>(Kim et al., 2009)

<sup>3</sup>Shape factor was a function of particle diameter Kim et al. (2009)

<sup>4</sup>(Endo, Chen, & Pui, 1998)
